# Supplementary material for: Influenza A Virus M1 Protein Non-Specifically Deforms Charged Lipid Membranes and Specifically Interacts with the Raft Boundary
Source: Membranes (Basel). 2023 Jan 7;13(1):76. doi: 10.3390/membranes13010076 (PMC9864314; doi:10.3390/membranes13010076)
Supplement: Supplementary file 1 [file membranes-13-00076-s001.zip › membranes-2086649-supplementary.pdf]

## SUPPORTING INFORMATION

# Influenza A Virus M1 Protein Non-Specifically Deforms Charged Lipid Membranes and Specifically Interacts with the Raft Boundary

Anna S. Loshkareva <sup>1</sup>, Marina M. Popova <sup>1</sup>, Liudmila A. Shilova <sup>1</sup>, Natalia V. Fedorova <sup>2</sup>, Tatiana A. Timofeeva <sup>3</sup>, Timur R. Galimzyanov <sup>1</sup>, Petr I. Kuzmin <sup>1</sup>, Denis G. Knyazev <sup>4,\*</sup> and Oleg V. Batishchev <sup>1,\*</sup>

<sup>1</sup> Laboratory of Bioelectrochemistry, Frumkin Institute of Physical Chemistry and Electrochemistry, Russian Academy of Sciences, 119071 Moscow, Russia

<sup>2</sup> Belozersky Institute of Physico-Chemical Biology, Lomonosov Moscow State University, 119991 Moscow, Russia

<sup>3</sup> Laboratory of Physiology of Viruses, D. I. Ivanovsky Institute of Virology, FSBI N. F. Gamaleya NRCM, Ministry of Health of Russian Federation, 123098 Moscow, Russia

<sup>4</sup> Institute of Biophysics, Johannes Kepler University Linz, 4020 Linz, Austria

\* Correspondence: olegbati@gmail.com (O.V.B.); denis.knyazev@jku.at (D.G.K.)

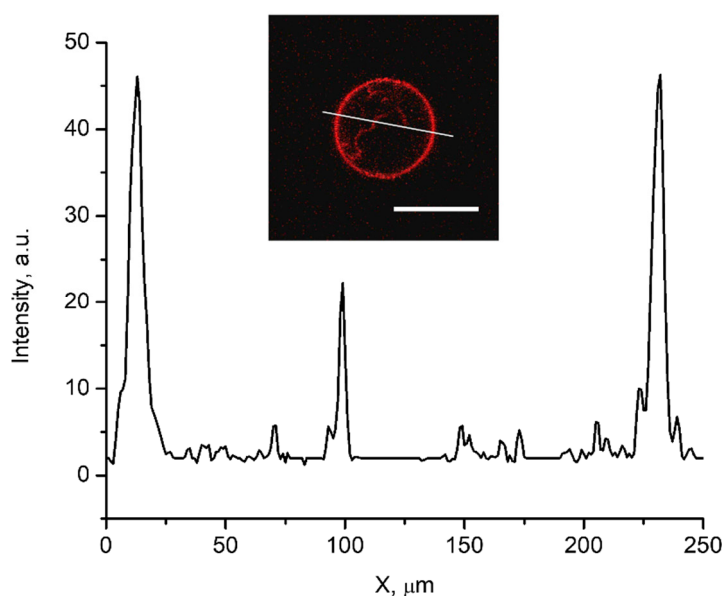

**Figure S1.** Fluorescent intensity profile across the charged GUV from the lipid mixture 2 after 10 seconds of perfusion with 1  $\mu\text{M}$  of the M1 protein. X scale is set along the profile (white line in the inset. Scale bar in inset is 20  $\mu\text{m}$ .

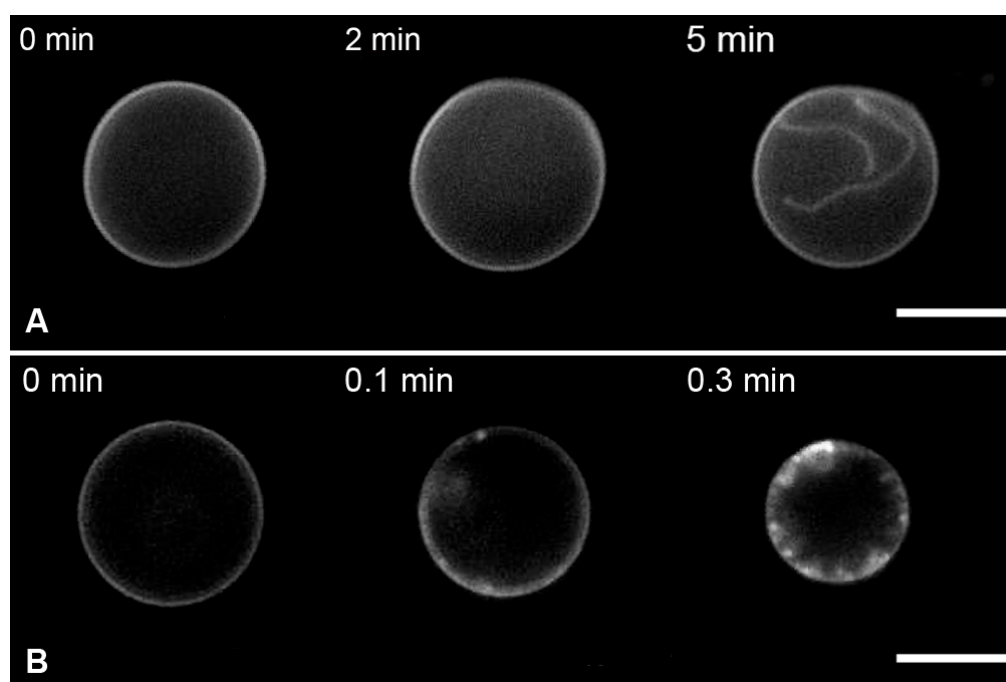

**Figure S2.** Monitoring the charged GUVs from the mixture DOPC:DOPS:Chol:Rho-PE = 39.9 mol%:40 mol%:20 mol%:0.1 mol% after 10 seconds of perfusion with (A) 10 μM of M1; (B) 2 μM PLL in the isosmotic mode. The scale bar is 10 μm.

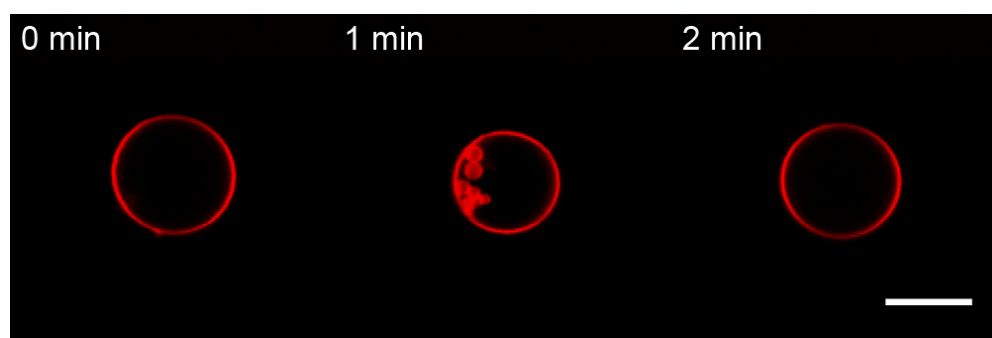

**Figure S3.** Monitoring the uncharged GUVs from the mixture 1 after 10 seconds of perfusion with the protein-free hyperosmotic solution (1 M NaCl, 50 mM MES, pH 7.0). The scale bar is 10 μm.

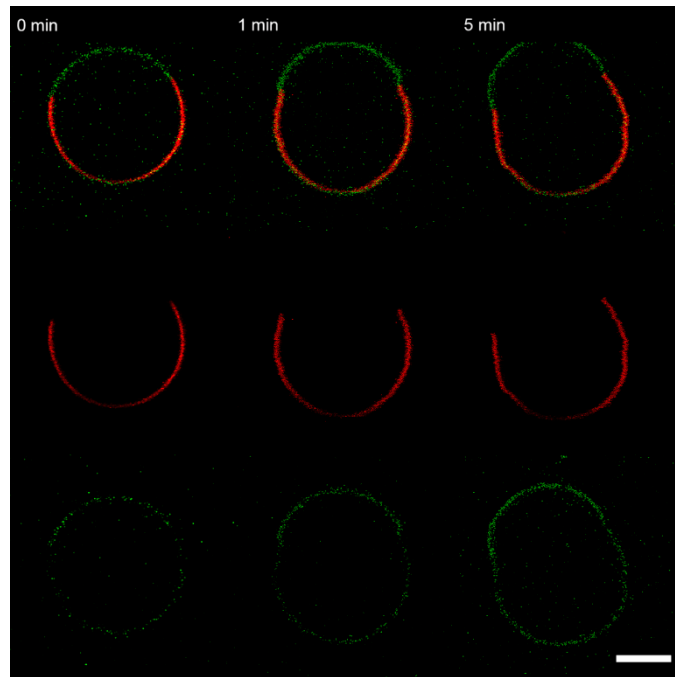

**Figure S4.** Perfusion with M1 of “raft” GUVs with DOPS instead of bPS (DOPS:Chol:SM:DOPC:BODIPY-GM1:Rho-PE = 20:33.3:33.3:13.3:0.01:0.01 (mol.%)). L<sub>d</sub> marker Rho-PE is in the red channel, L<sub>o</sub> marker BODIPY-GM1 is in the green channel. The scale bar is 5  $\mu$ m.

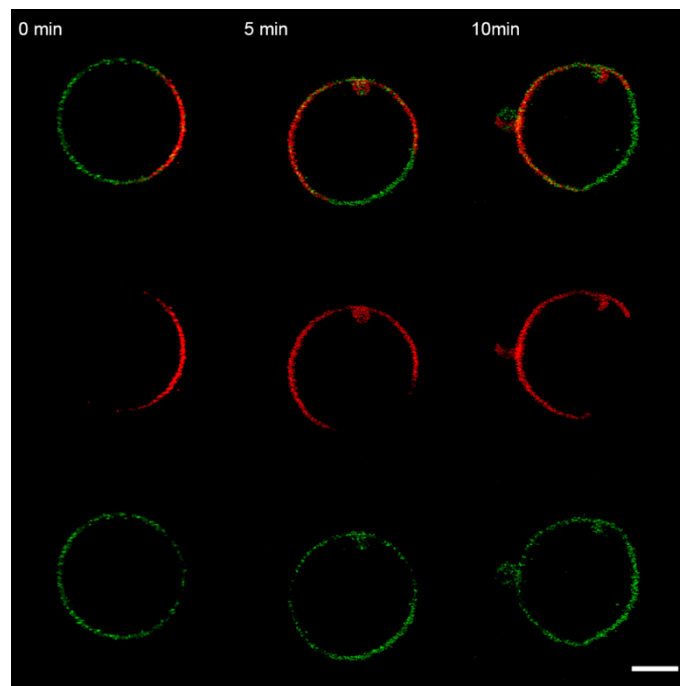

**Figure S5.** The same as Fig. S4, but for perfusion with BSA. The scale bar is 10  $\mu$ m.

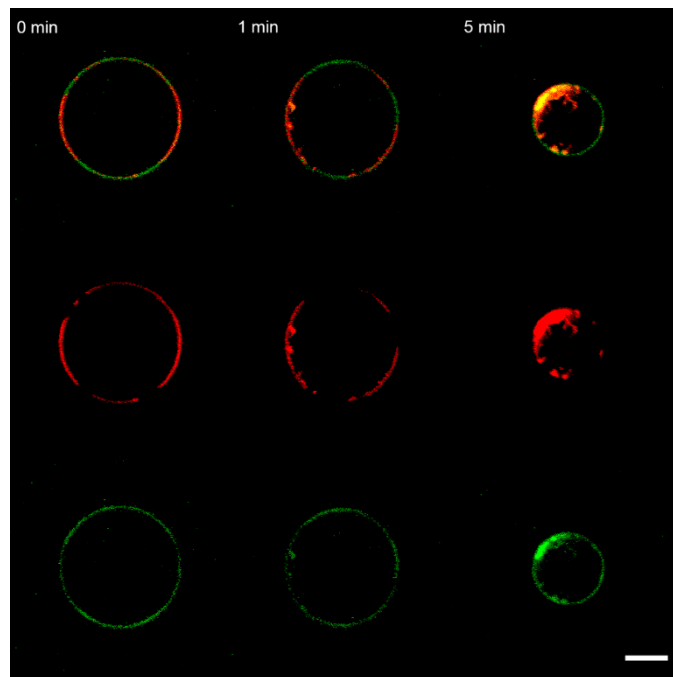

**Figure S6.** The same as Fig. S4, but for perfusion with PLL. The scale bar is 20  $\mu\text{m}$ .

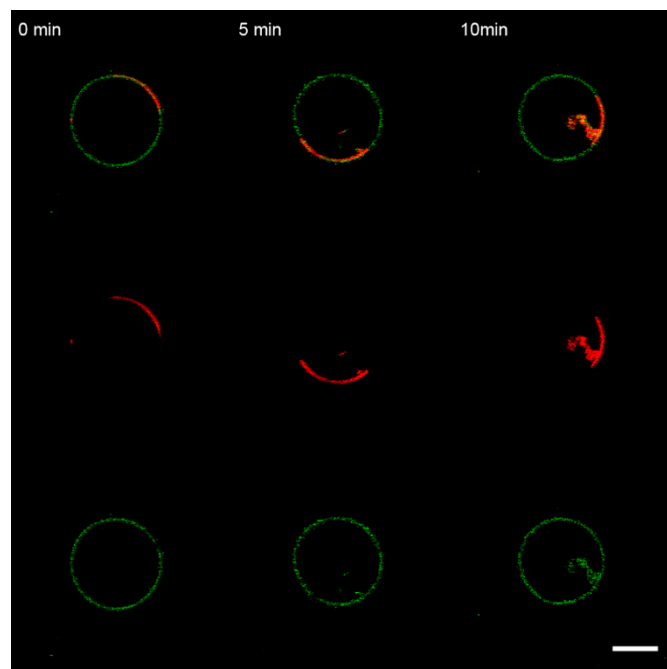

**Figure S7.** Perfusion with M1 of “raft” GUVs with DSPS instead of bPS (DSPS:Chol:SM:DOPC:BODIPY-GM1:Rho-PE = 20:33.3:33.3:13.3:0.01:0.01 (mol.%)). Color code is the same as in Fig. S4. The scale bar is 10  $\mu\text{m}$ .

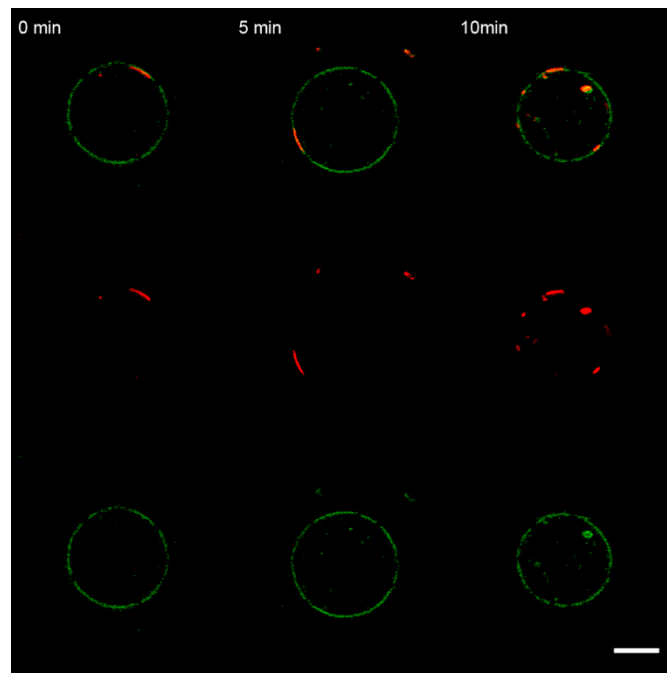

**Figure S8.** The same as Fig. S7, but for perfusion with PLL. The scale bar is 10  $\mu\text{m}$ .
